# Supplementary material for: Surface induced smectic order in ionic liquids – an X-ray reflectivity study of [C22C1im]+[NTf2]−
Source: Royal Society of Chemistry journal article supplement (doi:10.1039/c7cp04852a), 2017-01-01
Supplement: c7cp04852a1.pdf [file c7cp04852a1.pdf]

# Surface Induced Smectic Order in Ionic Liquids — An X-Ray Reflectivity Study of $[\text{C}_{22}\text{C}_{1}\text{im}]^+[\text{NTf}_2]^-$

Julian Mars, Binyang Hou, Henning Weiss, Hailong Li, Oleg Konovalov, Sven Festersen, Bridget M. Murphy, Uta Rütt, Markus Bier, and Markus Mezger

## Electronic Supplementary Information (ESI)

### DSC

Phase transition temperatures were determined by differential scanning calorimetry (Mettler Toledo DSC-822) using scan rates of  $1 \text{ K min}^{-1}$ ,  $2 \text{ K min}^{-1}$ ,  $5 \text{ K min}^{-1}$  and  $10 \text{ K min}^{-1}$ . Equilibrium phase transition temperatures were obtained by extrapolating to zero heating and cooling rates respectively.

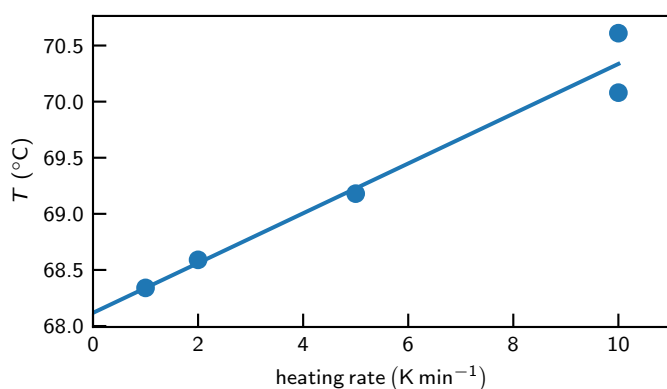

**Fig. S1.** (Color) Melting temperature determined by DSC heating rates of  $1 \text{ K min}^{-1}$ ,  $2 \text{ K min}^{-1}$ ,  $5 \text{ K min}^{-1}$  and  $10 \text{ K min}^{-1}$ . Equilibrium phase transition temperatures were obtained by extrapolating to zero heating rate.

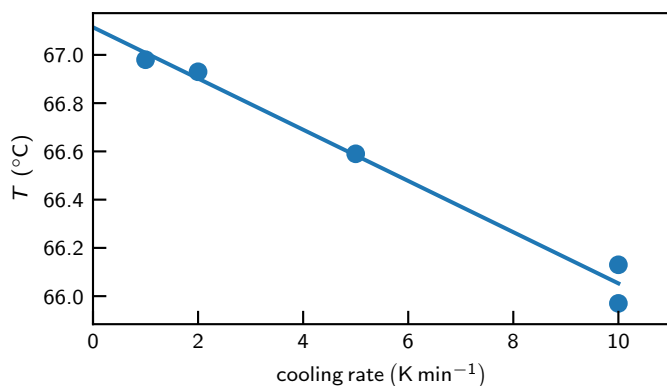

**Fig. S2.** (Color) Liquid crystalline transition temperatures  $T_{LC}$  determined by DSC cooling rates of  $1 \text{ K min}^{-1}$ ,  $2 \text{ K min}^{-1}$ ,  $5 \text{ K min}^{-1}$  and  $10 \text{ K min}^{-1}$ . Equilibrium phase transition temperatures were obtained by extrapolating to zero cooling rate.

### XRR

Parameter space mapping revealed that the fits of the model to the XRR data are highly sensitive to smectic layer thickness  $L$  (Eq. 4). Fits have been performed for offsets of  $\Delta L = -5 \text{ nm}$ ,  $-2 \text{ nm}$ ,  $-1 \text{ nm}$ ,  $2 \text{ nm}$  and  $5 \text{ nm}$  with respect to the best fit layer thickness  $L_0$ . The decrease of the fit quality is quantified by the increase  $\Delta = \chi_L/\chi_0 - 1$  of the cost function  $\chi_L$  with respect to the best fit cost value  $\chi_0$ . Figure S3 clearly shows that with increasing temperature the minima of  $\Delta$ , i.e., the best fit values for  $L$ , are shifting to smaller wetting layer thicknesses. Even for the highest temperature of  $115^\circ\text{C}$  investigated in this study, introducing a smectic layer significantly improves the fit.

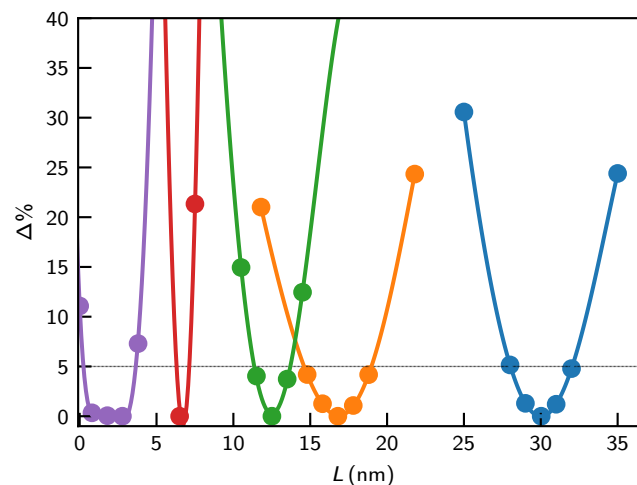

**Fig. S3.** (Color) Dependence of the fit quality on the smectic layer wetting thickness  $L$  for different temperatures (blue  $68^\circ\text{C}$ , orange  $70^\circ\text{C}$ , green  $73^\circ\text{C}$ , red  $87^\circ\text{C}$  and purple  $115^\circ\text{C}$ ). Errors of the fit value  $L$  are estimated within a 5% range of the fit quality  $\Delta$  (horizontal line).

In Fig S4a and Fig S4b exemplary reflectivity curves obtained for  $\Delta L = -5 \text{ nm}$ ,  $-2 \text{ nm}$ ,  $2 \text{ nm}$  and  $5 \text{ nm}$  are shown. Particularly, the height to width ratio of the first quasi-Bragg is significantly influenced by  $\Delta L$ .

For all values of  $\xi_s \gg L$  fits of comparable quality were obtained. Here, the series expansion  $\sinh(x) = x + \mathcal{O}(x^3)$  leads to a strong parameter coupling between  $\xi_s$  and  $S^-$ . Therefore, this parameter was fixed to  $\xi_s = 2000 \text{ nm}$ .

Analysis of the dependence on the surface tension  $\gamma$  are shown in Tab S1. The best fit parameters are only slightly affected by the assumptions for the surface tension (Tab. S1). In particular, a negligible influence on the smectic layer thickness  $L$  is found.

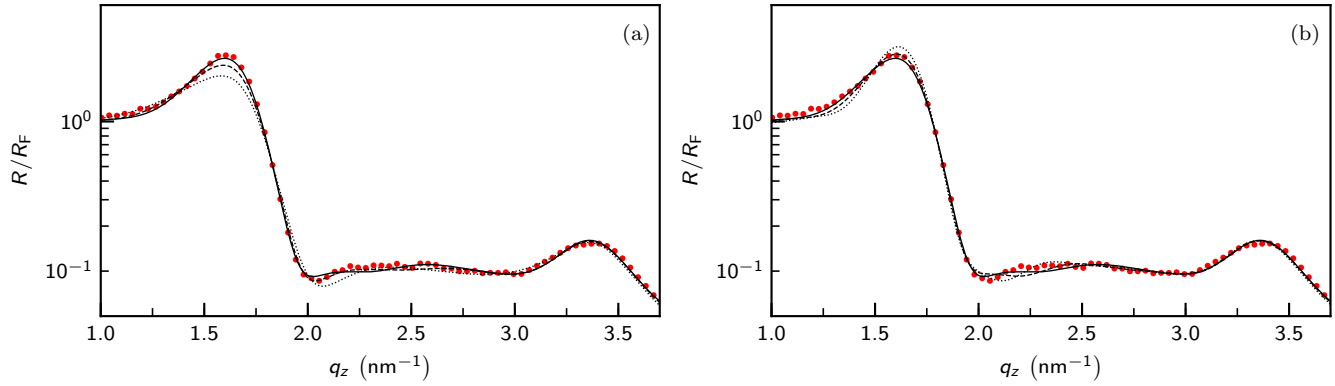

**Fig. S4.** (Color) Dependence of the fit on the smectic layer wetting thickness  $L$  for  $73\text{ }^\circ\text{C}$ . The solid line represents the best fit for  $L = 12.5\text{ nm}$  ((a) and (b)). Profiles obtained for  $\Delta L = -2\text{ nm}$  and  $-5\text{ nm}$  (a) and  $\Delta L = 2\text{ nm}$  and  $5\text{ nm}$  (b) are represent with dashed and dotted lines respectively .

**Table S1.** Comparison of fit parameters for different surface tensions  $\gamma$  at  $73\text{ }^\circ\text{C}$

| $\gamma$<br>$\text{mN m}^{-1}$ | $L$<br>$\text{nm}$ | $\xi_b^\dagger$<br>$\text{nm}$ | $d$<br>$\text{nm}$ | $z_0$<br>$\text{nm}$ | $\sigma_s$<br>$\text{nm}$ | $S^{0*}$ | $S^-$ | $B^*$ | $a_2$ | $\xi_2$<br>$\text{nm}$ |
|--------------------------------|--------------------|--------------------------------|--------------------|----------------------|---------------------------|----------|-------|-------|-------|------------------------|
| 25                             | 13.1               | 4.64                           | 3.72               | 2.23                 | 0.00                      | 1.59     | -179  | 7.02  | 0.18  | 12.5                   |
| 30                             | 12.5               | 4.64                           | 3.73               | 2.24                 | 0.10                      | 1.62     | -189  | 6.50  | 0.12  | 18.9                   |
| 40                             | 12.4               | 4.64                           | 3.74               | 2.23                 | 0.22                      | 1.53     | -179  | 6.06  | 0.10  | 18.6                   |
| 60                             | 12.4               | 4.64                           | 3.74               | 2.23                 | 0.30                      | 1.44     | -169  | 5.64  | 0.09  | 18.2                   |

<sup>†</sup> Parameters were fixed to the interpolated bulk values extracted from SAXS. \* Parameters were determined by continuity and differential continuity conditions.  $\xi_s$  was fixed at  $2000\text{ nm}$ .
